# Supplementary material
Source: MDPI journal article supplement (https://www.mdpi.com/2073-4441/14/9/1407)
Supplement: s1 [file s1]

Supplementary materials

# Nitrogen Modulates the Effects of Short-Term Heat, Drought and Combined Stresses after Anthesis on Photosynthesis, Nitrogen Metabolism, Yield, and Water and Nitrogen Use Efficiency of Wheat

Chen Ru <sup>1</sup>, Xiaotao Hu <sup>1,\*</sup>, Dianyu Chen <sup>1</sup>, Tianyuan Song <sup>1</sup>, Wene Wang <sup>1</sup>, Mengwei Lv <sup>1</sup> and Neil C. Hansen <sup>2</sup>

<sup>1</sup> Key Laboratory of Agricultural Soil and Water Engineering in Arid and Semiarid Areas, Ministry of Education, College of Water Resources and Architectural Engineering, Northwest A&F University, Xianyang 712100, China;

chenru1024@nwfau.edu.cn (C.R.); dianyuchen@nwsuaf.edu.cn (D.C.);

tianyuansong@nwfau.edu.cn (T.S.); wangwene@nwsuaf.edu.cn (W.W.); 2019050901@nwfau.edu.cn (M.L.)

<sup>2</sup> Department of Plant and Wildlife Sciences, Brigham Young University, Provo, UT 84602, USA;

neil\_hansen@byu.edu

\* Correspondence: huxiaotao11@nwsuaf.edu.cn; Tel.: +86-138-9281-6133; Fax: +86-29-87082117

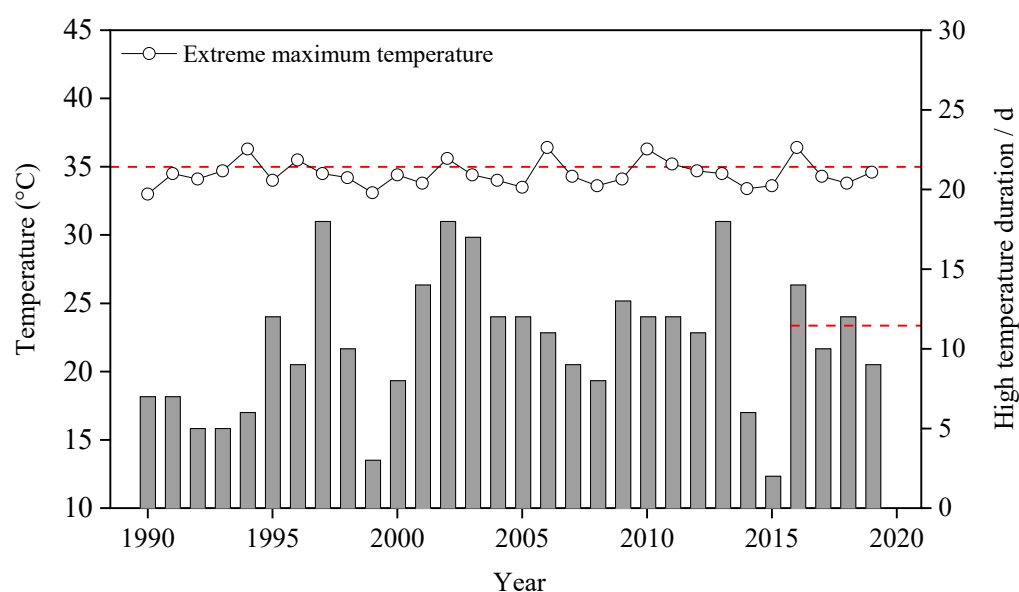

**Figure S1.** Extreme maximum temperature after winter wheat anthesis in the main production areas on the Guanzhong Plain in China from 1990 to 2019.

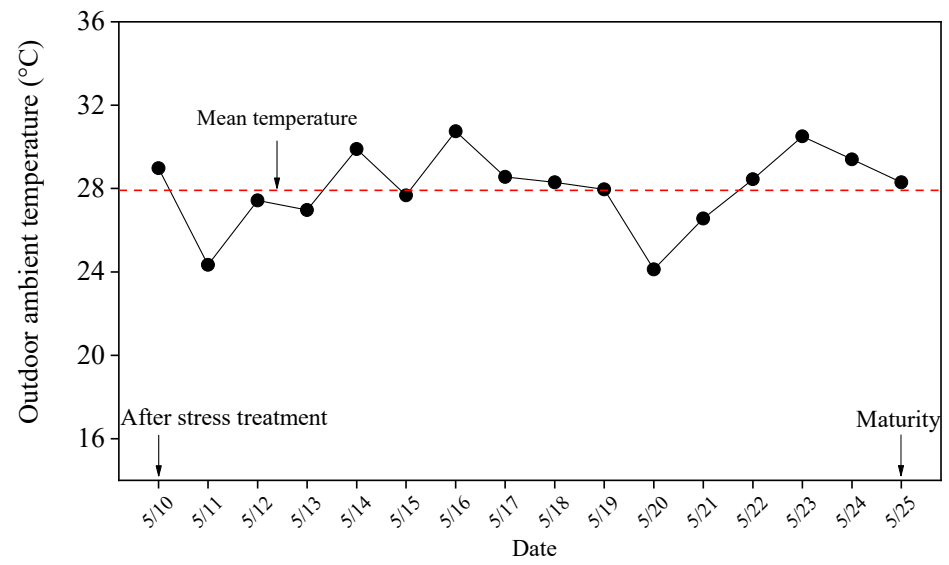

**Figure S2.** Changes in outdoor ambient temperature from stress relief to maturity.
